# Supplementary material for: RNAi Factors are Present and Active in Human Cell Nuclei
Source: PubMed Central journal article supplement (PMC3916906; doi:10.1016/j.celrep.2013.12.013), 2014-01-02
Supplement: NIHMS550334-supplement-03.pdf [file NIHMS550334-supplement-03.pdf]

**Table S1, Related to Figures 4 and 6 : Small RNAs, primers, probes and oligonucleotides (5' to 3')**

| <b>siRNAs/miRNAs</b>        |                                                                                        |                                                      |
|-----------------------------|----------------------------------------------------------------------------------------|------------------------------------------------------|
| <b>name</b>                 | <b>sequence</b>                                                                        | <b>notes</b>                                         |
| siLuc as                    | rUrGrUrUrCrArCrCrUrCrGrArUrArUrGrUrGrCTT                                               | antisense guide strand                               |
| siLuc ss                    | rGrCrArCrArUrArUrCrGrArGrUrGrArArCrATT                                                 | sense passenger strand                               |
| siLuc mm as                 | rUrGrUrUrCrArCrCrUrCrGrArUrArUrGrUrGrCTT                                               | antisense guide strand                               |
| siLuc mm ss                 | rGrCrArCrArUrArUrCrGrArGrUrGrArArCrATT                                                 | sense passenger strand                               |
| siLuc mm3,6 ss              | rGrCrUrCrArArUrCrGrArGrUrGrArArCrATT                                                   | sense passenger strand                               |
| siLuc mm9,10 ss             | rGrCrArCrArUrArUrCrGrArGrUrGrArArCrATT                                                 | sense passenger strand                               |
| siLuc mm13,16 ss            | rGrCrArCrArUrArUrCrGrArGrUrGrUrArCrATT                                                 | sense passenger strand                               |
| has-miR-19a 5p              | rArGrUrUrUrGrCrArUrArGrUrUrGrCrArCrUrArCrA                                             | antisense guide strand                               |
| has-miR-19a 3p              | rUrGrUrGrCrArArUrCrUrArUrGrCrArArArCrUrGrA                                             | sense passenger strand                               |
| siMalat as                  | rUrUrArCrArArCrCrArCrUrCrGrUrUrUrCTT                                                   | antisense guide strand                               |
| siMalat ss                  | rGrArArGrCrGrArGrUrGrUrUrGrUrArATT                                                     | sense passenger strand                               |
| siNeat as                   | rUrUrUrCrUrArArGrCrArArCrUrUrCrUrCrArCTT                                               | antisense guide strand                               |
| siNeat ss                   | rGrUrGrArGrArGrUrUrGrCrUrUrArGrArArATT                                                 | sense passenger strand                               |
| siRPL30 as                  | rArUrArCrGrArGrUrUrGrArGrCrCrUrArGTT                                                   | antisense guide strand                               |
| siRPL30 ss                  | rCrUrArGrGrCrUrCrCrArArCrUrCrGrUrUrArUTT                                               | sense passenger strand                               |
| siPPIA as                   | rUrUrArGrGrArUrGrArArGrUrCrUrCrArUrCTT                                                 | antisense guide strand                               |
| siPPIA ss                   | rGrArUrGrArGrArCrUrUrCrArUrCrUrArATT                                                   | sense passenger strand                               |
| <b>qPCR</b>                 |                                                                                        |                                                      |
| <b>name</b>                 | <b>sequence</b>                                                                        | <b>notes</b>                                         |
| Malat1 Prime Time Assay F   | ACCATCGTTACCTTGAAACCG                                                                  | forward primer for Malat-1 IDT prime time assay      |
| Malat1 Prime Time Assay R   | GATCTAGCACAGACCCTTCAC                                                                  | reverse primer for Malat-1 IDT prime time assay      |
| Malat1 Prime Time Assay P   | /56-FAM/CTCACCTCG/ZEN/ATGCAGCCAGTAGC/3IABkFQ/                                          | probe for Malat-1 IDT prime time assay               |
| Neat1 Prime Time Assay F    | TCTCTTCTCCACCATTACCA                                                                   | forward primer for Neat-1 IDT prime time assay       |
| Neat1 Prime Time Assay R    | CCTCCCTTTAACTTATCCATTAC                                                                | reverse primer for Neat-1 IDT prime time assay       |
| Neat1 Prime Time Assay P    | /56-FAM/AACAATACC/ZEN/GACTCCAACAGCCACT/3IABkFQ/                                        | probe for Neat-1 IDT prime time assay                |
| RPL30 Prime Time Assay F    | CACCAAGTTTTAGCCAACATAGC                                                                | forward primer for RPL30 IDT prime time assay        |
| RPL30 Prime Time Assay R    | GATCAGACAAGGCCAAGCGCA                                                                  | reverse primer for RPL30 IDT prime time assay        |
| RPL30 Prime Time Assay P    | /56-FAM/ACAACCTGCC/ZEN/CAGCTTTGAGGAAATCT/3IABkFQ/                                      | probe for RPL30 IDT prime time assay                 |
| GAPDH Taqman Assay          | proprietary                                                                            | Applied Biosystems (Hs99999905_m1)                   |
| PPIA Taqman Assay           | proprietary                                                                            | Applied Biosystems (Hs99999904_m1)                   |
| <b>5' RACE</b>              |                                                                                        |                                                      |
| <b>name</b>                 | <b>sequence</b>                                                                        | <b>notes</b>                                         |
| GeneRacer RNA Adaptor       | rCrGrArCrUrGrGrArGrCrArCrGrArGrArCrArCrUrGrA<br>rCrArUrGrGrArCrUrGrArArGrGrArGrArArArA | 5' RACE ligation adaptor                             |
| GeneRacer™ 5' Primer        | CGACTGGAGCACGAGGACACTGA                                                                | universal forward primer for 5' RACE PCR             |
| GeneRacer™ 5' Nested Primer | GGACACTGACATGGACTGAAGGAGTA                                                             | nested forward primer for 5' RACE PCR                |
| MALAT15RACE1                | CCCCCGCCTCAGTTACACATCCA                                                                | Malat-1-specific reverse primer for 5' RACE PCR      |
| MALAT15RACE2                | CCCCCGCCTCAGTTACACATCCAAA                                                              | Malat-1-specific reverse primer for 5' RACE PCR      |
| RPL305RACE                  | CCGCATGCTGTGCCAGTTCAAT                                                                 | RPL30-specific reverse primer for 5' RACE PCR        |
| RPL30-329-76                | TCACCAGTCTGTTCTGGCATGCTTC                                                              | RPL30-specific reverse primer for 5' RACE nested PCR |
| RPL30nested-281-78          | CAGAGTCACCTGGATCAATGATAGCC                                                             | RPL30-specific reverse primer for 5' RACE nested PCR |
| RPL30nested-202-78          | GCCACTGTAGTGATGGACACCAGTTT                                                             | RPL30-specific reverse primer for 5' RACE nested PCR |
| RPL30nested-314-78          | CACCAAGTCTGTTCTGGCATGCTTCTA                                                            | RPL30-specific reverse primer for 5' RACE nested PCR |

rN = RNA base; /56-FAM/ = 5' 6-FAM (Fluorescein); /ZEN/ = internal ZEN quencher; /3IABkFQ/ = 3' Iowa Black FQ quencher
